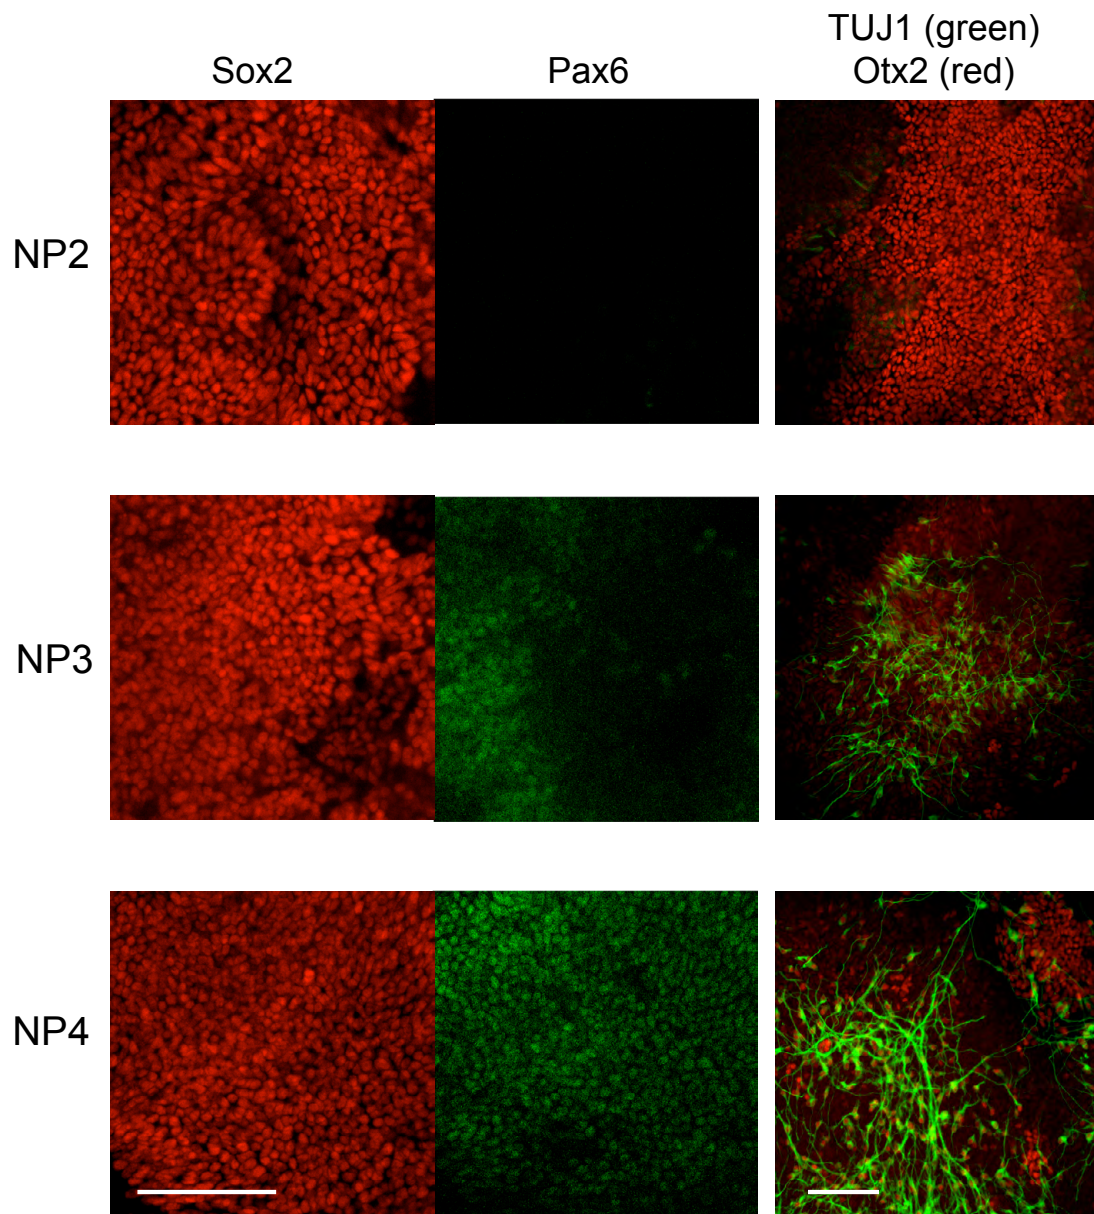

**Fig. S1. Immunohistological analysis of NP2 to NP4 cells for expression of Sox2 and Pax6 (double staining) and Otx2 and TuJ1.** Sox2 continued to be expressed in the majority of cells, whereas Otx2 began to be downregulated at NP3, in an inverse relationship with the appearance of Pax6-immunopositive and TuJ1-positive NP3 cells and the increase in NP4 cells. The TuJ1 (neuron-specific class III  $\beta$ -tubulin) staining pattern indicated a wider extension of the neurites in NP4 cells compared with NP3 cells. Scale bars: 100  $\mu$ m.

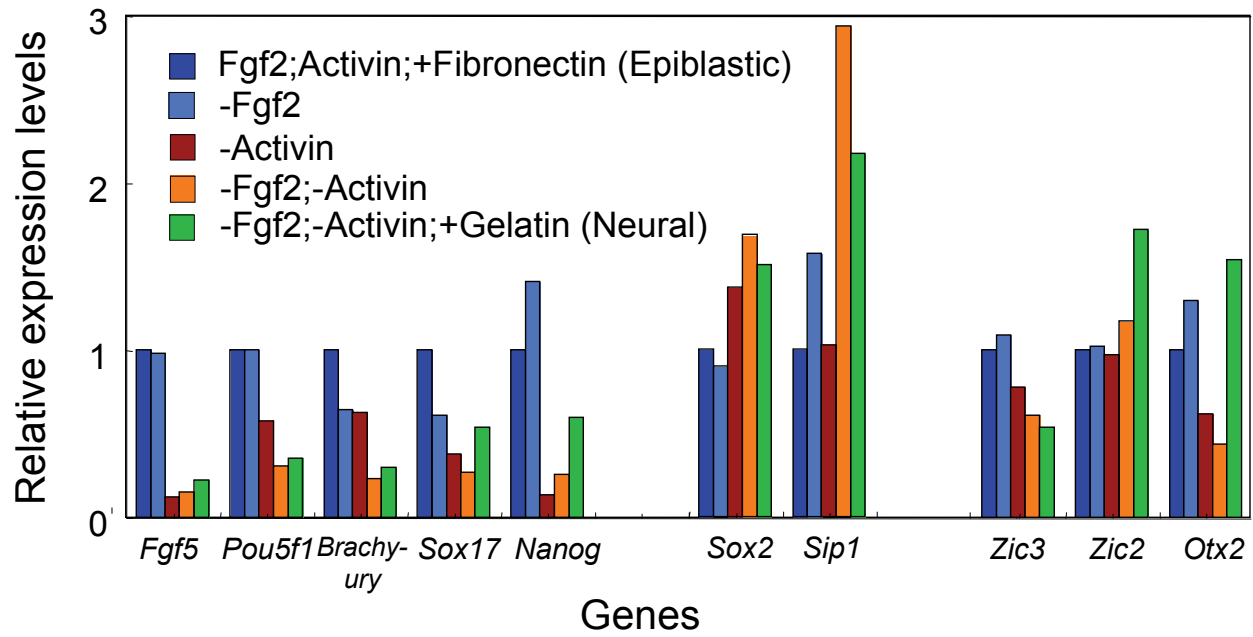

**Fig. S2. Synergistic contributions of the removal of growth factors and changing the culture substrate coating to the promotion of ANP cell development from EpiSCs.** The complete culture medium contained Fgf2, activin and the culture substrate was coated with fibronectin. The expression levels of genes under various culture conditions, as determined by qRT-PCR, are shown relative to those in EpiSCs grown in complete culture medium. The effects of the removal of Fgf2 on the epiblast state were modest, in contrast to the strong downregulation of *Fgf5*, *Pou5f1*, *brachyury* (*T*), *Sox17* and *Nanog* after the removal of activin. However, downregulation of *Pou5f1*, *T* and *Sox17* was significantly enhanced by the simultaneous removal of Fgf2 and activin. *Sox2* and *Sip1* were strongly activated by the removal of Fgf2 and activin together. The activation of *Otx2* and *Zic2*, which will be shown to be crucial for ANP development in a later section, was promoted by altering the substrate coating from fibronectin to gelatin.

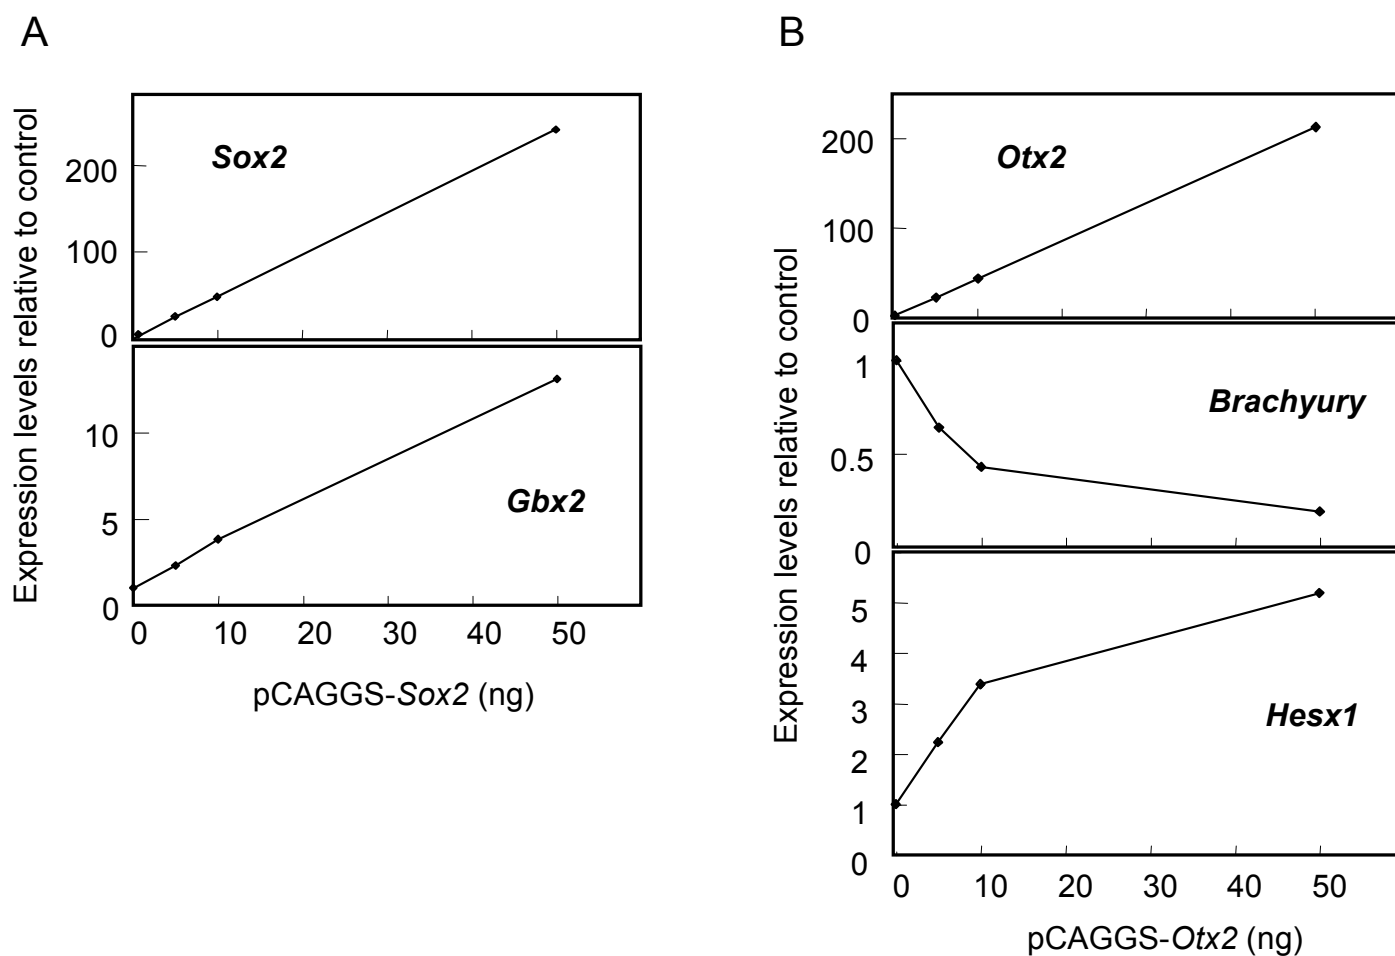

**Fig. S3. Responses of the indicated genes to varying amounts of transfected Sox2 and Otx2 expression vectors.** Expression levels were determined by qRT-PCR and are shown relative to the endogenous levels in EpiSCs. Exogenous *Sox2* and *Otx2* increased linearly with the vector input over the range of 0-50 ng per well. **(A)** Sox2 transfection. Endogenous *Gbx2* was activated linearly with the exogenous Sox2 level. **(B)** Otx2 transfection. The repression of brachyury (*T*) and activation of *Hesx1* by Otx2 reached a plateau with ~10 ng of expression vector.

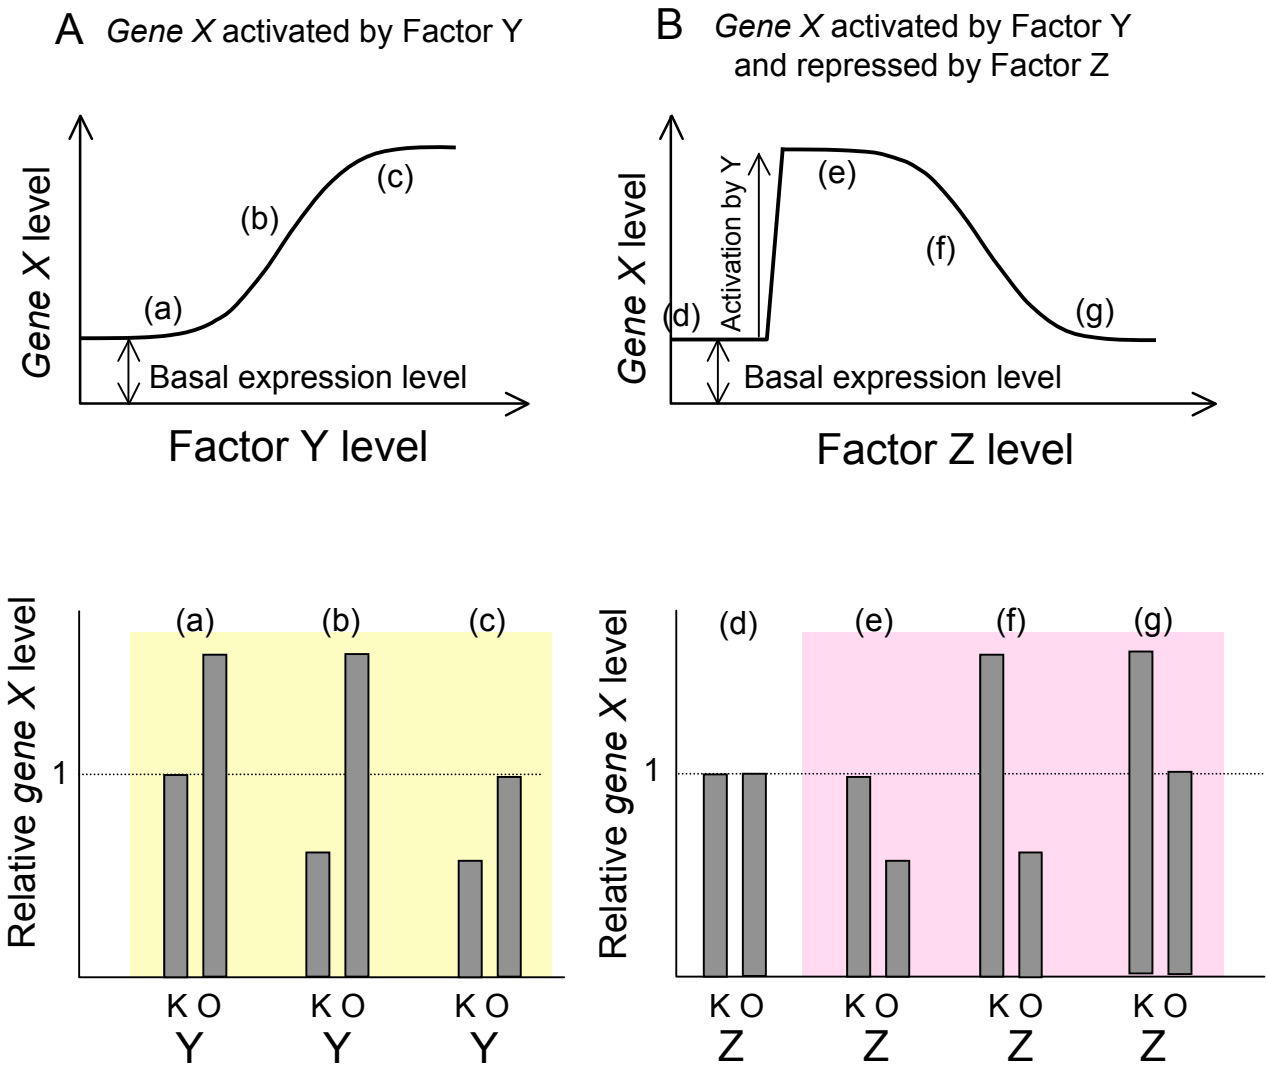

**Fig. S4. Responses of genes to transcription factor manipulations according to their activation and/or repression status.** The expected responses are shown schematically in the case of activation (A) and repression (B). The gene *X* level without knockdown or overexpression of factor Y (A) or factor Z (B) under a given condition is indicated as 1 for bar graphs. **(A)** In the case where gene *X* is activated by transcription factor Y, the effects of knockdown (K) and overexpression (O) of factor Y depend on the status of activation: (a) if gene *X* is not yet activated by Y, only the overexpression of Y increases gene *X* expression above basal levels; (b) when gene *X* has already been activated but not to the level of saturation, the knockdown of Y reduces, whereas the overexpression of Y augments, gene *X* expression; (c) if gene *X* is already activated by Y to saturation levels, only a knockdown of Y downregulates gene *X*. **(B)** Cases in which gene *X* is activated by transcription factor Y and repressed by Z: (d) if gene *X* is not yet activated, neither knockdown nor overexpression of Z affects its basal expression level; (e) under conditions where gene *X* is activated by a transcription factor (Y), but is not repressed by Z, then only the overexpression of Z will reduce gene *X* expression; (f) if gene *X* is in the middle of repression by Z, then knockdown of Z augments, and its overexpression reduces, gene *X* expression; (g) when gene *X* is completely repressed by Z, only knockdown of Z augments its expression.

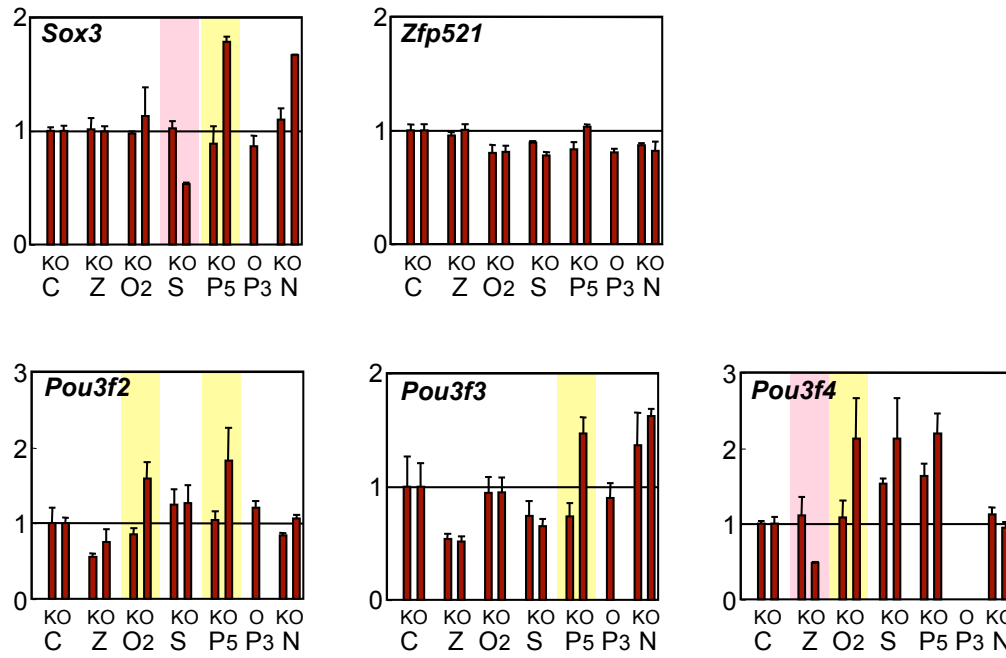

**Fig. S5.** Continuation of the analysis shown in Fig. 3, representing cases with miscellaneous responses to exogenous transcription factor manipulations.

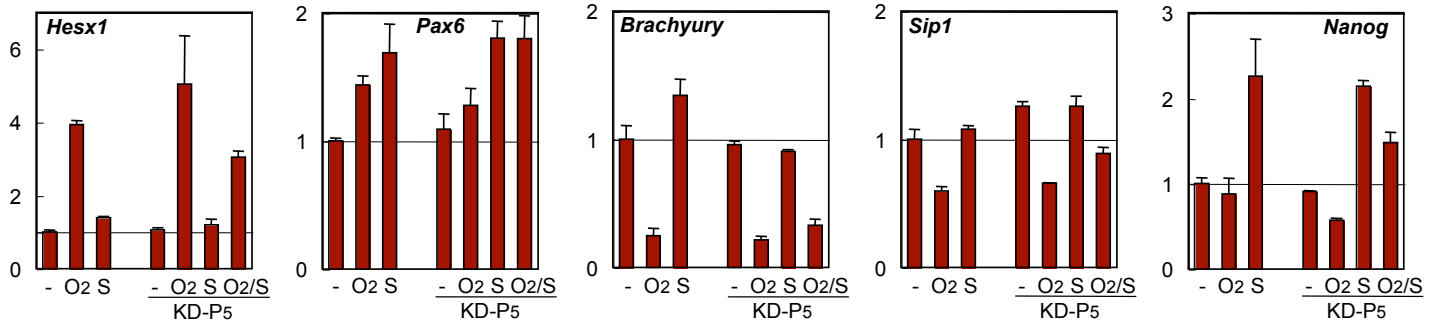

**Fig. S6.** The effects of overexpressing Otx2 or Sox2 and of Pou5f1 knockdown on the expression of five representative transcription factor genes in epiblastic state EpiSCs. Analysis was in parallel with those described in Fig. 4A. O2, Otx2; S, Sox2; KD-P5, Pou5f1 knockdown.

A

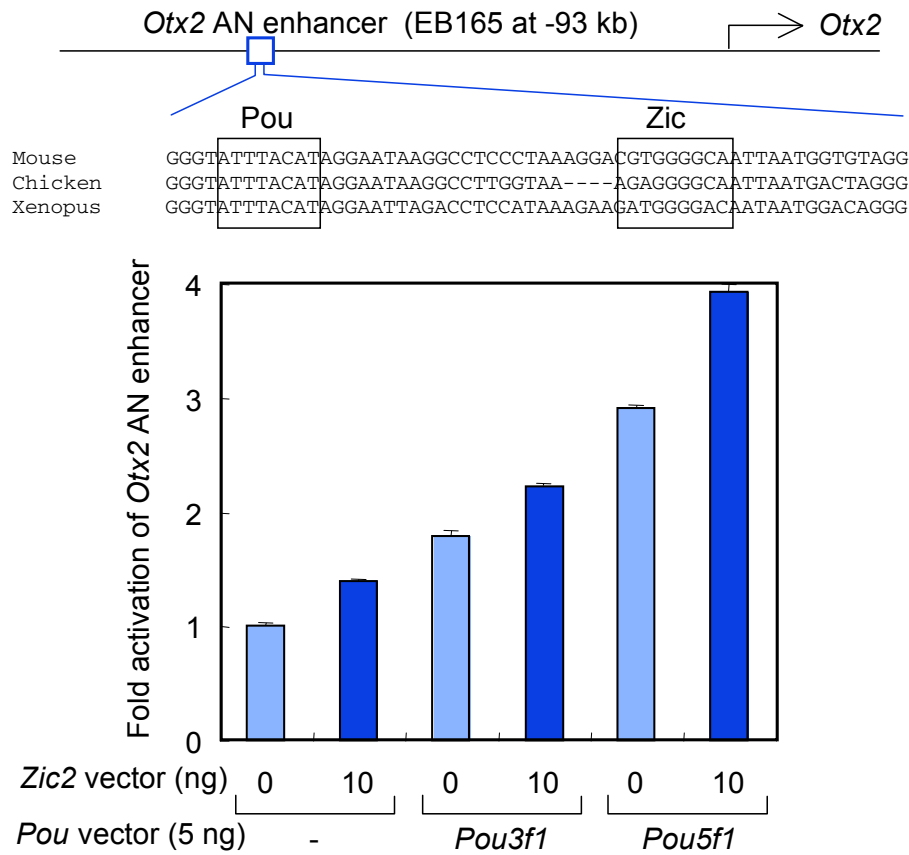

B

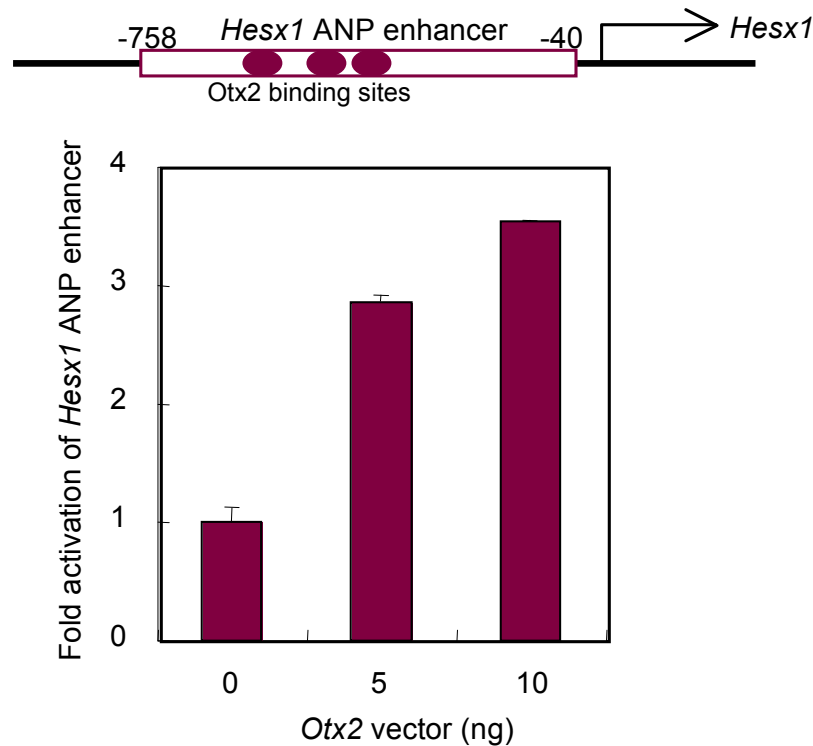

**Fig. S7. Activation of *Otx2* AN and *Hesx1* ANP enhancers.** (A) *Otx2* AN enhancer (Kurokawa et al., 2004) (165 bp EB fragment) containing a Pou binding site and a putative Zic binding site (top) was joined to the luciferase reporter, and its activation by Zic2 and Pou factors was measured in 10T1/2 fibroblasts. (B) The *Hesx1* ANP enhancer used in this study (top) contained three previously characterized Otx2 binding sites (Spieler et al., 2004). Its activation by Otx2 was measured by luciferase reporter assay.

A

N2 core CCCTGCCCGTTCGCCTTCATTTCCATAAAGGAGATTAGGAGAGGAGGGGAACCCACTCAAATGCAGATGCAGGAG

Probe A CCCTGCCCGTTCGCCTTC

Mut-ZIC CCCTGCCTAGGTACGTTCGCCTTC

Probe B GCCTTCATTTCCATAAGGAGATTAGGAGAG

Mut-POU GCCTTCGCGTAACTAAGGAGATTAGGAGAG

Mut-INT GCCTTCATTTCCATCGATAGATTAGGAGAG

Mut-OTX GCCTTCATTTCCATAAGGCTCGGCGGAGAG

B

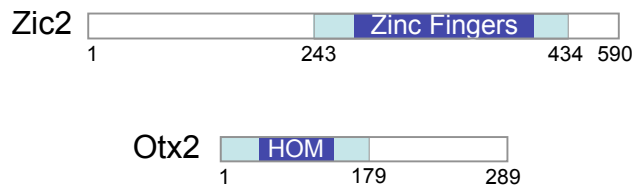

C

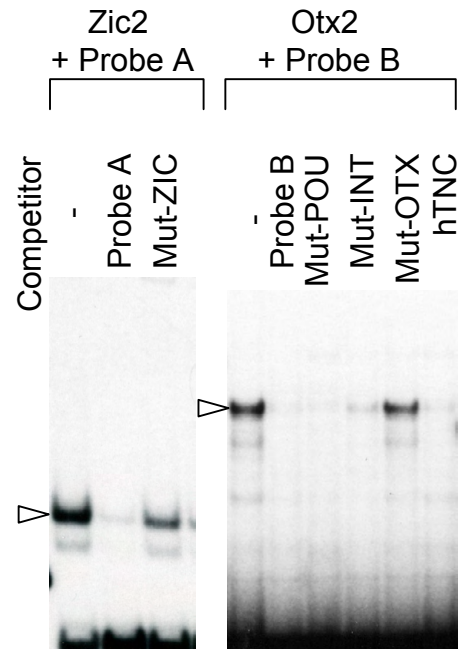

**Fig. S8. EMSA analysis of the binding of Zic2 and Otx2 to the N2 enhancer core sequence.** (A) Probes and mutated competitor sequences used in the EMSA assay. (B) In vitro synthesized transcription factors used in the EMSA assay. The domains of these proteins, indicated by light-blue shading, were synthesized in vitro. HOM, homeodomain. (C) Competitive inhibition of factor binding to radiolabeled probes using various mutated competitor sequences. The *hTNC* (human tenascin C) competitor contains an OTX binding sequence (Briata et al., 1999). The band positions of Zic2 plus Probe A and Otx2 plus Probe B are indicated by open arrowheads. The formation of the former complex was inhibited by the probe sequence, but not by the Mut-ZIC sequence. The latter complex was inhibited by competitors carrying intact Otx2 binding sequences, but not by the Mut-OTX sequence. Zic3 gave identical results to Zic2 (data not shown).

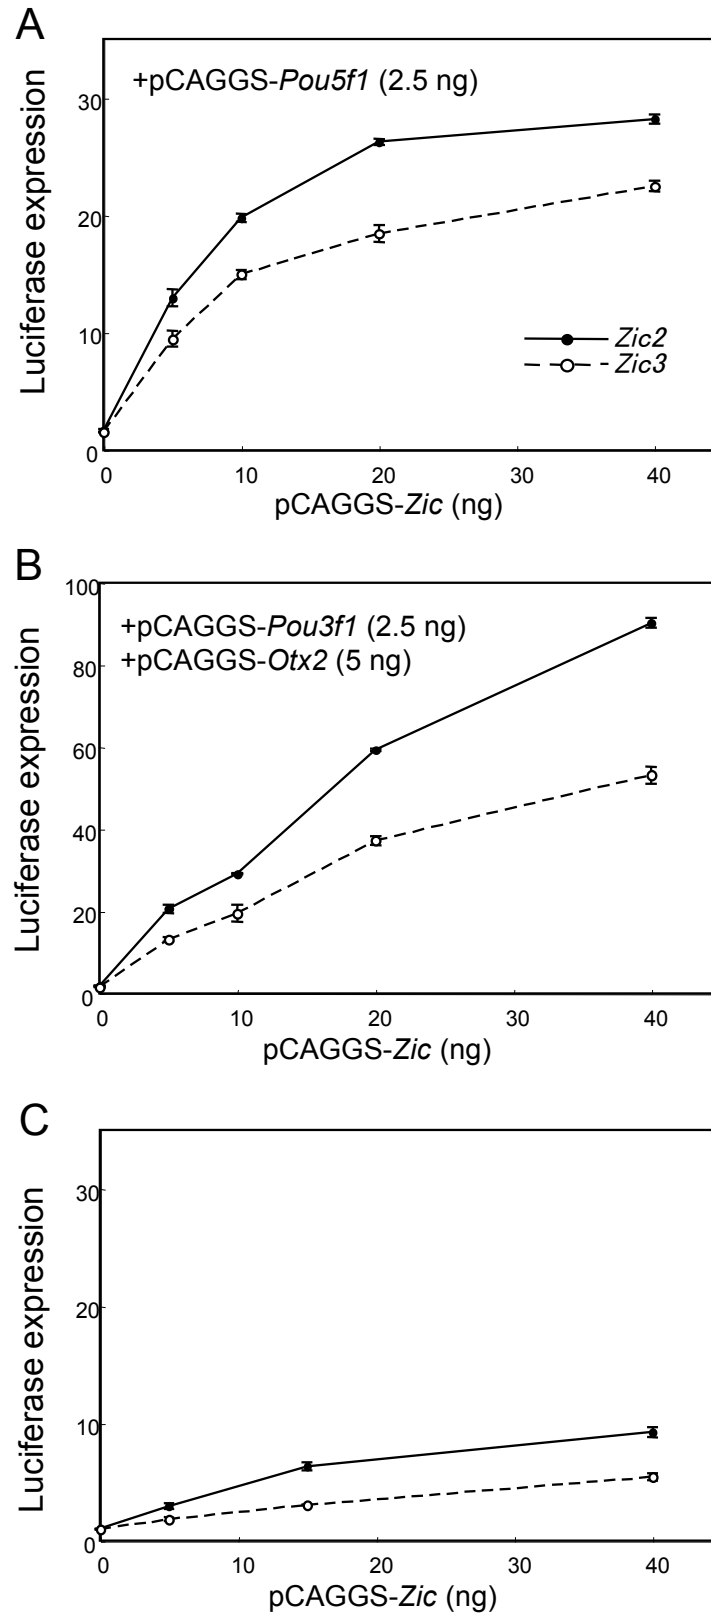

**Fig. S9. Comparison of the activity of *Zic2* and *Zic3* in the activation of the N2 core enhancer.** Under the same conditions used for the transfection of 10T1/2 cells with N2[73bp]<sub>2</sub>-luciferase as described in Fig. 8, varying amounts of expression vectors for *Zic2* (solid circle and solid line) or *Zic3* (open circle and broken line) were co-transfected with (A) pCAGGS-*Pou5f1* (2.5 ng), (B) pCAGGS-*Pou3f1* (2.5 ng) and pCAGGS-*Otx2* (5 ng), or (C) alone. *Zic3* activated the N2 core enhancer in a manner analogous to that of *Zic2* under the conditions given in A and B.



**Table S1.** Primers used in qRT-PCR analyses

| Target gene   | Forward primer             | Tm (C) | Reverse primer               | Tm (C) | Reference sequence (the range of coding sequence) | Target position | of PCR product (bp) | Reference           |
|---------------|----------------------------|--------|------------------------------|--------|---------------------------------------------------|-----------------|---------------------|---------------------|
| <i>Gapdh</i>  | CATGGCCTTCGGTGTTCCTA       | 60     | GCGGCACGTCAGATCCA            | 59     | NM_008084.2 (51-1052)                             | 734-788         | 55                  | This study          |
| <i>Fgf5</i>   | AGAGTGGGCATCGGTTTCC        | 59     | TGGGAGCCATTGACTTTGC          | 58     | NM_010203.4 (229-1023)                            | 502-560         | 59                  | This study          |
| <i>Nanog</i>  | AGGCCTGGACCGCTCAGT         | 59     | AGTTATGGAGCGGAGCAGCAT        | 60     | NM_028016.2 (216-1133)                            | 907-996         | 60                  | This study          |
| <i>Eomes</i>  | GCCTTCCACCTTTGATGTATCC     | 58     | AAAGCTTTGGCGCCTTCTCT         | 59     | NM_010136.3 (472-2595)                            | 2680-2740       | 61                  | This study          |
| <i>Sox2</i>   | CCATGGGCTCTGTGGTCAAG       | 60     | CCCTGGAGTGGGAGGAAGAG         | 60     | NM_011443 (412-1371)                              | 1133-1204       | 72                  | This study          |
| <i>Sox3</i>   | CTGGGACCGTTGCCCTTGA        | 58     | CCGACAGTTACGGCCAACT          | 59     | NM_009237.2 (1-1353)                              | 1439-1498       | 60                  | This study          |
| <i>Sox1</i>   | CGGAGGACAAAAGACAAAACC      | 59     | AAGTTACAGAGCCGGCAGTCA        | 59     | NM_009233.3 (843-2018)                            | 2310-2377       | 80                  | This study          |
| <i>Pou5f1</i> | TTCCCTCTGTTCCCGTCACT       | 58     | TGGTGCTCAGTTTGAATGC          | 58     | NM_013633.2 (62-1120)                             | 1071-1127       | 57                  | This study          |
| <i>Pou3f1</i> | AGACCACCATCTGCCGTTTC       | 59     | TCCAGCCACTTGTGAGCAG          | 59     | NM_011141 (62-1411)                               | 924-1008        | 85                  | This study          |
| <i>Pou3f2</i> | CGGATTACTCAAGCAGACGTG      | 59     | CAACAAAGGCTTCAGCTTGC         | 58     | NM_008899.1 (1-1338)                              | 858-990         | 133                 | This study          |
| <i>Pou3f3</i> | CCCTTGACTTCTGCCCTCAA       | 59     | CATCCGACGACCCATTC            | 60     | NM_008900.2 (1-1494)                              | 2639-2695       | 57                  | This study          |
| <i>Pou3f4</i> | GCCACAGCTGCCTCGAAT         | 59     | CATGGACAAGGGAGCTGGAA         | 60     | NM_008901 (1-1086)                                | 4-58            | 55                  | This study          |
| <i>Otx2</i>   | GAAATCAACTTGCAGAAATCCA     | 59     | GCGGCACCTTAGCTCTTCGAT        | 58     | NM_144841.3 (333-1202)                            | 551-614         | 64                  | This study          |
| <i>Zic2</i>   | GCAGGGCCACCTTCTTTTC        | 57     | GCCCATTTAGCAGCTTCTG          | 57     | NM_009574.3 (293-1882)                            | 751-824         | 74                  | This study          |
| <i>Zic3</i>   | TTTTAGGGTGCTGTTGGTTATTGA   | 59     | ACAATTCCTTATCTCCACTTTTCTGTTA | 58     | NM_009575.2 (554-1954)                            | 3729-3800       | 72                  | This study          |
| <i>Sip1</i>   | ACACTTTCCTTTTCGCTATTTCATGA | 58     | TGAGGCCTAAAAGTGTGTGGTTAC     | 58     | NM_015753.3 (527-4174)                            | 4650-4721       | 72                  | This study          |
| <i>Zfp521</i> | TCCCCCGCCAAACTTCA          | 60     | GTACCACCCATCCCTTCGAA         | 58     | NM_145492.4 (235-4170)                            | 762-820         | 59                  | This study          |
| <i>Hesx1</i>  | TCAGCTCCGGGAAAGCAA         | 59     | CCAGTCTAAAATGCTCTCAATTG      | 58     | MN_010420.2 (359-916)                             | 385-446         | 62                  | This study          |
| <i>Otx1</i>   | GCGTCACCCCTTCAAGTCTTT      | 59     | AACAGAGGGTCAGAGCGAAGAG       | 59     | NM_011023.3 (282-1349)                            | 1635-1712       | 78                  | This study          |
| <i>Pax6</i>   | ATGGGCATTGGTATGTTATAATGAAG | 58     | AACACAGATCCGCGATCCA          | 59     | NM_013627.4 (526-1836)                            | 2094-2158       | 65                  | This study          |
| <i>Gbx2</i>   | CAGCGACCACCTTCCCATAC       | 59     | CGCAGTGTTTGTCTTGTGTCT        | 59     | NM_010262.3 (422-1468)                            | 1793-1853       | 61                  | This study          |
| <i>Nkx1.2</i> | CCAGAGGGCGAGGAGAAGT        | 58     | GACCCCTCAGTGGCTTGTGT         | 59     | NM_009123.2 (112-1029)                            | 1156-1212       | 57                  | This study          |
| <i>T</i>      | TTGAACTTTCCTCCATGTGCTGA    | 61     | TCCCAAGAGCCTGCCACTTT         | 61     | NM_009309.2 (109-1419)                            | 1421-1502       | 82                  | Greber et al., 2010 |
| <i>Sox17</i>  | ATAAGCCCAGATGGGTCTTC       | 58     | CCGTGGCTGTCTGAGAGGTT         | 59     | NM_011441.4 (1083-2342)                           | 2209-2275       | 67                  | This study          |

**Table S2.** Sequences inserted in pSilencerU6puro (Ambion) to produce shRNAs

| Target genes   | Sequences inserted (SENSE-loop-ANTISENSE)             | References                |
|----------------|-------------------------------------------------------|---------------------------|
| Control        | AGACAGCGAAACTGTTCTC-ttcaagaga-GAGAACAGTTTCGCTGTCT     | Zeineddine et al., 2006   |
| <i>Zic2/3*</i> | GAGAACCTCAAGATCCACA-ttcaagaga-TGTGGATCTTGAGGTTCTC     | This study                |
| <i>Otx2</i>    | GGCTTCAGGTTATAGTCAAGG-ttcaagaga-CCTTGACTATAACCTGAAGCC | This study                |
| <i>Sox2</i>    | GGTTGATATCGTTGGTAAT-ttcaagaga-ATTACCAACGATATCAACC     | Ivanova et al., 2006      |
| <i>Pou5f1</i>  | AGGTGTTTCAGCCAGACCAC-ttcaagaga-GTGGTCTGGCTGAACACCT    | Zeineddine et al., 2006   |
| <i>Pou3f1</i>  | GCCCATGGACGACGTTTATGC-ttcaagaga-GCATAAACGTCGTCCATGGGC | Iwafuchi-Doi et al., 2011 |
| <i>Nanog</i>   | GAGACAGTGAGGTGCATAT-ttcaagaga-ATATGCACCTCACTGTCTC     | Wang et al., 2007         |

\*The shRNA vector for *Zic2/3* was designed to target both *Zic* factor genes because of their functional similarities.

**Table S3. References for expression patterns in embryos from E6.5 to E8.5**

| Genes         | References                                      |
|---------------|-------------------------------------------------|
| <i>Fgf5</i>   | Hebert et al., 1991                             |
| <i>Nanog</i>  | Hart et al., 2004                               |
| <i>Eomes</i>  | Ciruna and Rossant, 1999; Hancock et al., 1999  |
| <i>Sox2</i>   | Uchikawa et al., 2011; Wood and Episkopou, 1999 |
| <i>Sox3</i>   | Uchikawa et al., 2011; Wood and Episkopou, 1999 |
| <i>Sox1</i>   | Uchikawa et al., 2011; Wood and Episkopou, 1999 |
| <i>Pou5f1</i> | Perea-Gomez et al., 1999                        |
| <i>Pou3f1</i> | Zwart et al., 1996                              |
| <i>Pou3f2</i> | Bouchard et al., 2005                           |
| <i>Pou3f3</i> | Bouchard et al., 2005                           |
| <i>Pou3f4</i> | Bouchard et al., 2005                           |
| <i>Otx2</i>   | Ang et al., 1994; Martinez-Barbera et al., 2001 |
| <i>Zic2</i>   | Elms et al., 2004; Inoue et al., 2007           |
| <i>Zic3</i>   | Elms et al., 2004; Inoue et al., 2007           |
| <i>Sip1</i>   | Miyoshi et al., 2006                            |
| <i>Zfp521</i> | Kamiya et al., 2011                             |
| <i>Hesx1</i>  | Yang and Klingensmith, 2006                     |
| <i>Otx1</i>   | Sakurai et al., 2010; Suda et al., 1999         |
| <i>Pax6</i>   | Inoue et al., 2000                              |
| <i>Gbx2</i>   | Waters et al., 2003                             |
| <i>Nkx1.2</i> | Tamplin et al., 2008                            |
| <i>T</i>      | Wilkinson et al., 1990                          |
| <i>Sox17</i>  | Kanai-Azuma et al., 2002                        |

**Link to Table 4.**

<http://dev.biologists.org/content/vol0/issue2012/images/data/dev.085936/DC1/DEV085936TableS4.xls>

**Table S5. Transfection efficiency and selection of transfected cells using puromycin (Pur), as estimated from CAGGS-EGFP expression**

| Cells             | EGFP-expressing cell fraction (%) |                    |
|-------------------|-----------------------------------|--------------------|
|                   | Without Pur selection             | With Pur selection |
| Epiblastic EpiSCs | 77                                | 93                 |
| NP1 cells         | 56                                | 95                 |

**Table S6. Knockdown and overexpression efficiencies of transcription factors**

| Transcription factor genes | Knockdown in epiblastic cells | Knockdown in NP1 cells | Overexpression in epiblastic cells |
|----------------------------|-------------------------------|------------------------|------------------------------------|
| <i>Zic2</i>                | 0.59                          | 0.73                   | 256*                               |
| <i>Zic3</i>                | 0.19                          | 0.34                   | —                                  |
| <i>Otx2</i>                | 0.36                          | 0.55                   | 211                                |
| <i>Sox2</i>                | 0.33                          |                        | 257                                |
| <i>Pou5f1</i>              | 0.37                          | 0.14                   | 100                                |
| <i>Pou3f1</i>              | 0.63                          |                        | 146                                |
| <i>Nanog</i>               | 0.18                          |                        | 14                                 |

The values indicate the transcript expression levels determined by qRT-PCR after transfection of knockdown or overexpression vectors relative to untreated cells, which was taken as 1.

\*pCAGGS-*Zic2* was used to overexpress *Zic2/3* functions.

**Table S7. Endogenous expression of transcription factor genes in 10T1/2 fibroblasts used for enhancer transactivation analysis, as compared with EpiSCs**

| Gene          | 10T1/2          | EpiSC         |
|---------------|-----------------|---------------|
| <i>Sox2</i>   | 0.0445±0.0022   | 7.62±1.51     |
| <i>Zic2</i>   | 0.0481±0.0149   | 1.07±0.09     |
| <i>Zic3</i>   | 0.00872±0.00155 | 12.0±2.36     |
| <i>Otx2</i>   | 0.0185±0.0039   | 7.82±0.45     |
| <i>Pou5f1</i> | 0.0161±0.0014   | 74.4±5.5      |
| <i>Pou3f1</i> | Undetectable    | 1.78±1.03     |
| <i>Pou3f2</i> | 0.00761±0.00154 | 0.0101±0.0012 |
| <i>Pou3f4</i> | Undetectable    | 0.0158±0.0043 |

Expression levels are relative to  $10^{-3}$  *Gapdh* and indicated with standard errors.
